# Supplementary material for: Possible involvement of the oxLDL/LOX-1 system in the pathogenesis and progression of human intervertebral disc degeneration or herniation
Source: PubMed Central journal article supplement (PMC5547039; doi:10.1038/s41598-017-07780-x), 2017-08-07
Supplement: 41598_2017_7780_MOESM1_ESM.pdf [file 41598_2017_7780_MOESM1_ESM.pdf]

Possible involvement of the oxLDL/LOX-1 system in pathogenesis and progression of human intervertebral disc degeneration or herniation

Xinhua Li<sup>a</sup>, Xuejun Wang<sup>b</sup>, Zhouyang Hu<sup>a</sup>, Zhaoxiong Chen<sup>a</sup>, Haoxi Li<sup>a</sup>, Xiaoming Liu<sup>a</sup>, ZhiYao Yong<sup>a</sup>, Shanjing Wang<sup>a</sup>, Zhanying Wei<sup>c</sup>, Yingchao Han<sup>a</sup>, Jun Tan<sup>a</sup>, Cong Li<sup>a</sup>, Xiao bo He<sup>d</sup>, Guixin Sun<sup>E\*</sup>, Desheng Wu<sup>a\*</sup>, Lijun Li<sup>a\*</sup>

a Department of Spinal Surgery, Shanghai East Hospital, Tongji University School of Medicine, 150 JiMo Road, Shanghai 200120, China.

b Department of Cardiovascular Medicine, Shanghai East Hospital, Tongji University School of Medicine, Shanghai, 200120, China.

c Metabolic Bone Disease and Genetic Research Unit, Division of Osteoporosis and Bone Disease, Department of Endocrinology and Metabolism, Shanghai Jiao Tong University Affiliated Sixth People's Hospital, Shanghai, China

d Department of medical imaging, Shanghai East Hospital East Hospital, Tongji University, School of Medicine, 150 JiMo Road, Shanghai 200120, China

e Department of Traumatology, Shanghai East Hospital, Tongji University, School of Medicine, 150 JiMo Road, Shanghai 200120, China

\*Correspondence author:

Li jun Li : Department of Spinal Surgery, East Hospital, Tongji University, School of Medicine, 150 JiMo Road, Shanghai 200120, China.

Phone number: 021-38804518, Fax number: 021-58798999, E-mail: liliju@163.com

Desheng Wu: Department of Spinal Surgery, East Hospital, Tongji University, School of Medicine, 150 JiMo Road, Shanghai 200120, China.

Phone number: 021-38804518, Fax number: 021-58798999, E-mail: eastspinesci@163.com

Gui xin Sun: Department of Traumatology, East Hospital, Tongji University, School of Medicine, 150 JiMo Road, Shanghai 200120, China

Phone number: 021-38804518, Fax number: 021-58798999, E-mail:tjdxxyjs@163.com

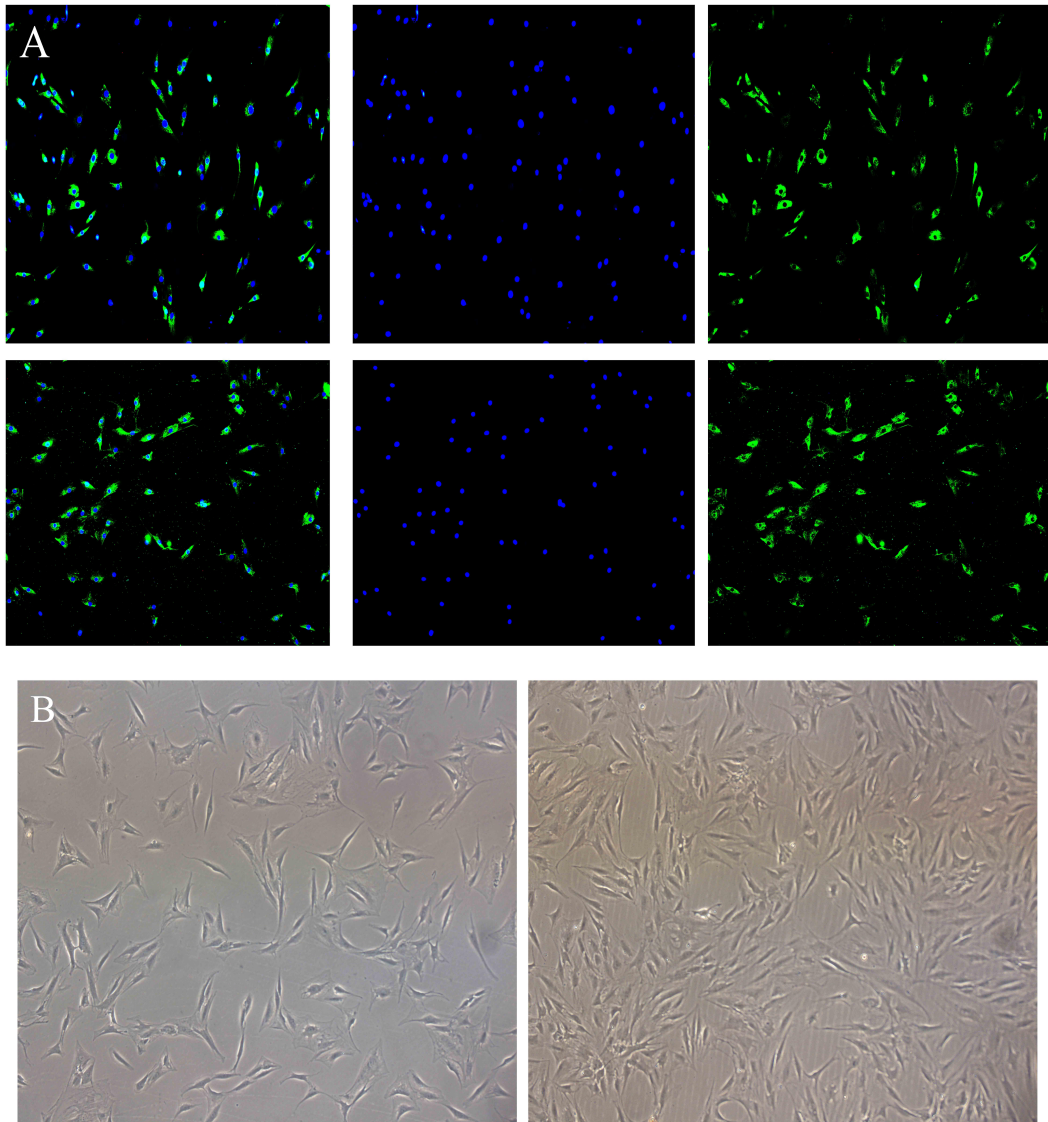

Supplement data: The identify of NPCs ' phenotype character by immunofluorescence and morphology. A:Representative fluorescent microscopic images of Hoechst/PI double stained nucleus pulposus cells with aggrecan. The cells appear aggrecan-positive staining were recognized as NPC. The The purity of NPC=aggrecan-positivecell/all cells(counted by DAPI)\*100%. As result, the purity of NPC reached 98% after calculating1000 cells. B: The morphology of NPCs.
